# Supplementary material
Source: PubMed Central journal article supplement (PMC6394850)
Supplement: NIHMS1521643-supplement-1.pdf [file NIHMS1521643-supplement-1.pdf]

## Supporting Information

**Title** Cell-templated Supported Lipid Bilayers for T Cell Activation

*Brynn R. Olden, Caleb R. Perez, Ashley L. Wilson, Ian I. Cardle, Yu-Shen Lin, Bryan Kaehr, Joshua A. Gustafson, Michael C. Jensen, Suzie H. Pun\**

## Supporting Tables

**Table S1.** Molar composition of lipid bilayers

| <b>Molar %</b> | <b>Liquid Crystalline (Fluid)</b>  | <b>Ordered Gel (Stationary)</b>   |
|----------------|------------------------------------|-----------------------------------|
| 77.5           | DOPC ( $T_m = -17^\circ\text{C}$ ) | DSPC ( $T_m = 55^\circ\text{C}$ ) |
| 20             | Cholesterol                        | Cholesterol                       |
| 0.02-2         | DSPE-PEG-Biotin                    | DSPE-PEG-Biotin                   |
| 0.5-2.48       | 18:1 PEG-2000 PE                   | 18:0 PEG-2000 PE                  |

**Table S2.** Size and polydispersity of liposomes

| <b>Formulation</b> | <b>Z-average diameter (nm)</b> | <b>PDI</b> |
|--------------------|--------------------------------|------------|
| DOPC 2%            | 86.91                          | 0.251      |
| DOPC 0.2%          | 104.7                          | 0.361      |
| DOPC 0.02%         | 87.61                          | 0.337      |
| DSPC 2%            | 81.13                          | 0.172      |
| DSPC 0.2%          | 81.22                          | 0.161      |
| DSPC 0.02%         | 93.74                          | 0.213      |

**Table S3.** Antibody clones and vendors for intracellular cytokine staining (ICCS) panel

| <b>Panel: ICCS</b> | <b>Clone</b> | <b>Dye</b>                             | <b>Vendor</b>  |
|--------------------|--------------|----------------------------------------|----------------|
| Live/Dead          | N/A          | BD Horizon Fixable Viability Stain 520 | BD Biosciences |
| CD4                | SK3          | APC                                    | Biolegend      |
| CD8                | SK1          | PacBlue                                | Biolegend      |
| 4-1BB              | 4B4-1        | PE                                     | Biolegend      |
| TNF $\alpha$       | MAb11        | BUV395                                 | BD Biosciences |
| IFN $\gamma$       | 4S.B3        | BV786                                  | BD Biosciences |
| IL-2               | MQ1-17H12    | PE-Cy7                                 | Biolegend      |

**Table S4.** Antibody clones and vendors for outgrowth panel

| <b>Panel:</b> | <b>Clone</b> | <b>Dye</b> | <b>Vendor</b> |
|---------------|--------------|------------|---------------|
|---------------|--------------|------------|---------------|

| <b>Outgrowth</b> |        |                                    |           |
|------------------|--------|------------------------------------|-----------|
| Live/Dead        | N/A    | Zombie NIR Fixable Viability Stain | Biologend |
| CD3              | HIT3a  | PE                                 | Biologend |
| CD4              | RPA-T4 | APC                                | Biologend |
| CD8              | RPA-T8 | FITC                               | Biologend |

**Table S5.** Antibody clones and vendors for differentiation panel

| <b>Panel: Differentiation</b> | <b>Clone</b> | <b>Dye</b>                             | <b>Vendor</b>  |
|-------------------------------|--------------|----------------------------------------|----------------|
| Live/Dead                     | N/A          | BD Horizon Fixable Viability Stain 520 | BD Biosciences |
| CD4                           | OKT4         | PE-Dazzle594                           | Biologend      |
| CD8                           | SK1          | PacBlue                                | Biologend      |
| CD45RA                        | HI100        | BV785                                  | Biologend      |
| CD62L                         | DREG-56      | PE                                     | Biologend      |
| PD-1                          | EH12.2H7     | BV711                                  | Biologend      |
| CCR7                          | 150503       | BUV395                                 | BD Biosciences |

**Table S6.** Summary of statistical analysis on aAPC design parameters and T cell response

|                                                                               | <b>Antibody Density</b>         | <b>Lipid</b>        | <b>Shape</b>               |
|-------------------------------------------------------------------------------|---------------------------------|---------------------|----------------------------|
| <b>Outgrowth</b>                                                              | p<0.0001, positive linear trend | p<0.0001, DOPC>DSPC | p=0.34                     |
| <b>CD4/CD8 Ratio</b>                                                          | p=0.21                          | p=0.0035, DOPC>DSPC | p<0.0001, HeLa>RBC>uSphere |
| <b>CD4<sup>+</sup> Differentiation (CD45RA<sup>+</sup>/CD62L<sup>+</sup>)</b> | p=0.0016, positive linear trend | p=0.15              | p=0.0013, RBC>uSphere      |
| <b>CD8<sup>+</sup> Differentiation (CD45RA<sup>+</sup>/CD62L<sup>+</sup>)</b> | p=0.011, positive linear trend  | p=0.037, DSPC>DOPC  | p<0.0001, RBC≈HeLa>uSphere |
| <b>PD-1<sup>+</sup>, CD4<sup>+</sup></b>                                      | p=0.13                          | p=0.49              | p<0.001, uSphere>HeLa≈RBC  |
| <b>PD-1<sup>+</sup>, CD8<sup>+</sup></b>                                      | p=0.14                          | p=0.004, DSPC>DOPC  | p=0.32                     |

Supporting Figures

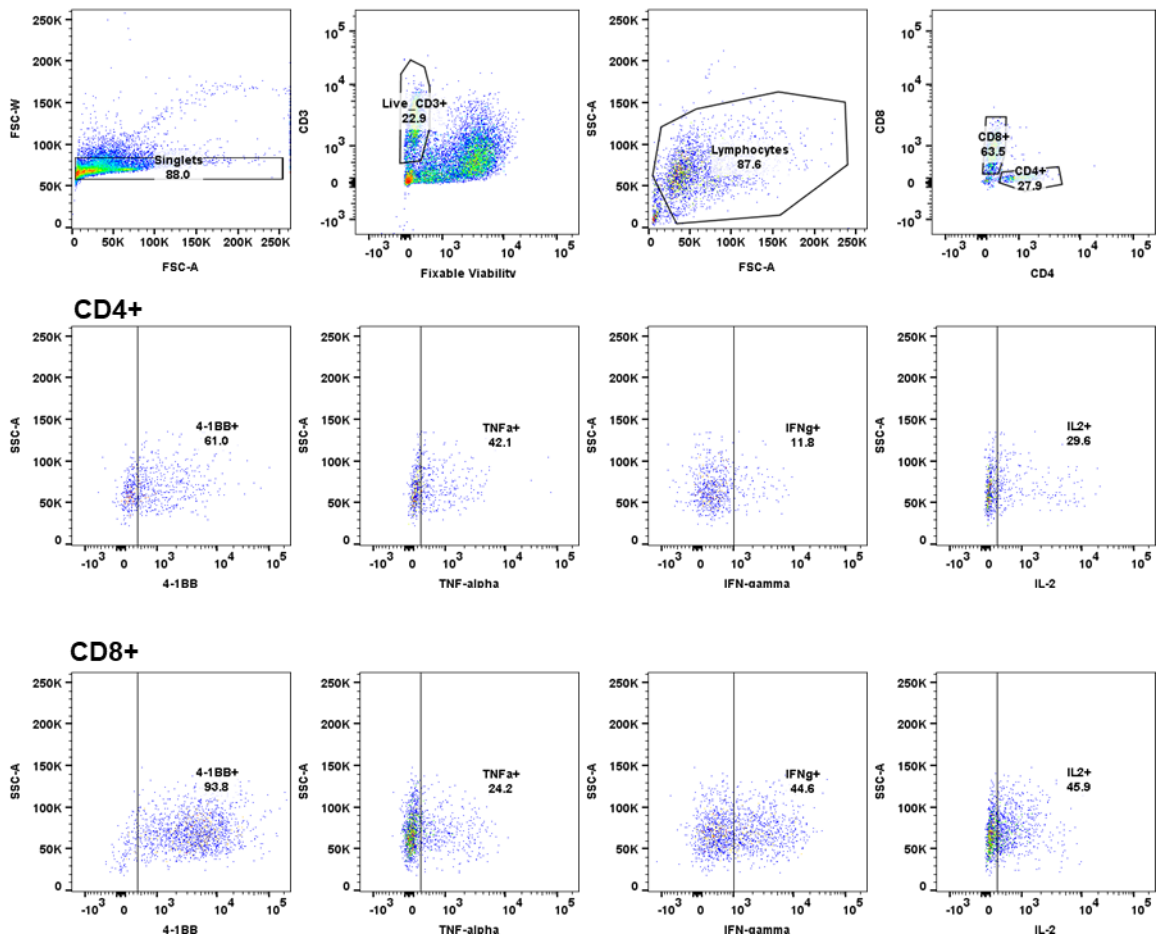

Figure S1. Gating strategy for ICCS flow analysis

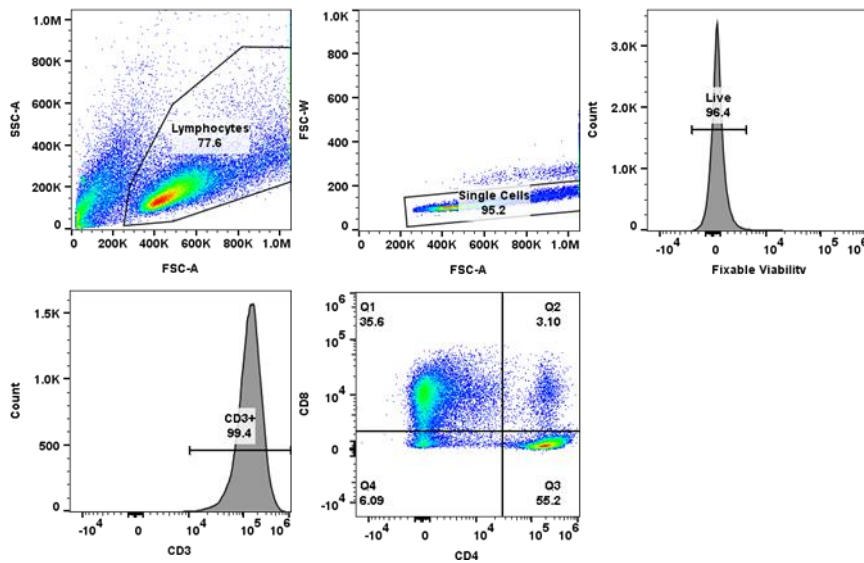

Figure S2. Gating strategy for outgrowth flow analysis

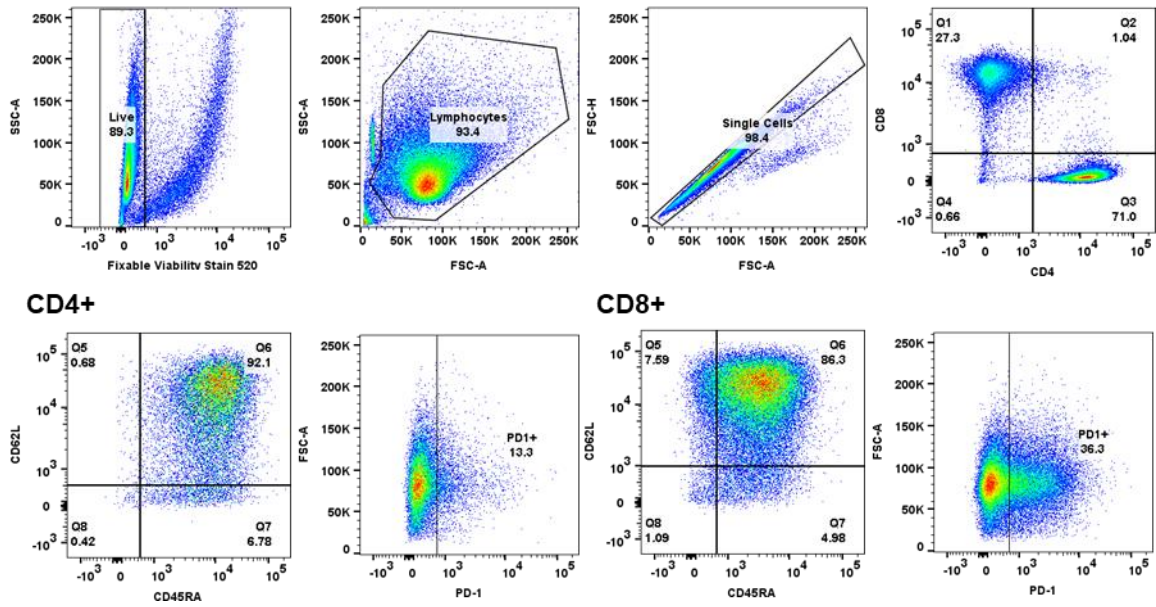

Figure S3. Gating strategy for differentiation flow analysis

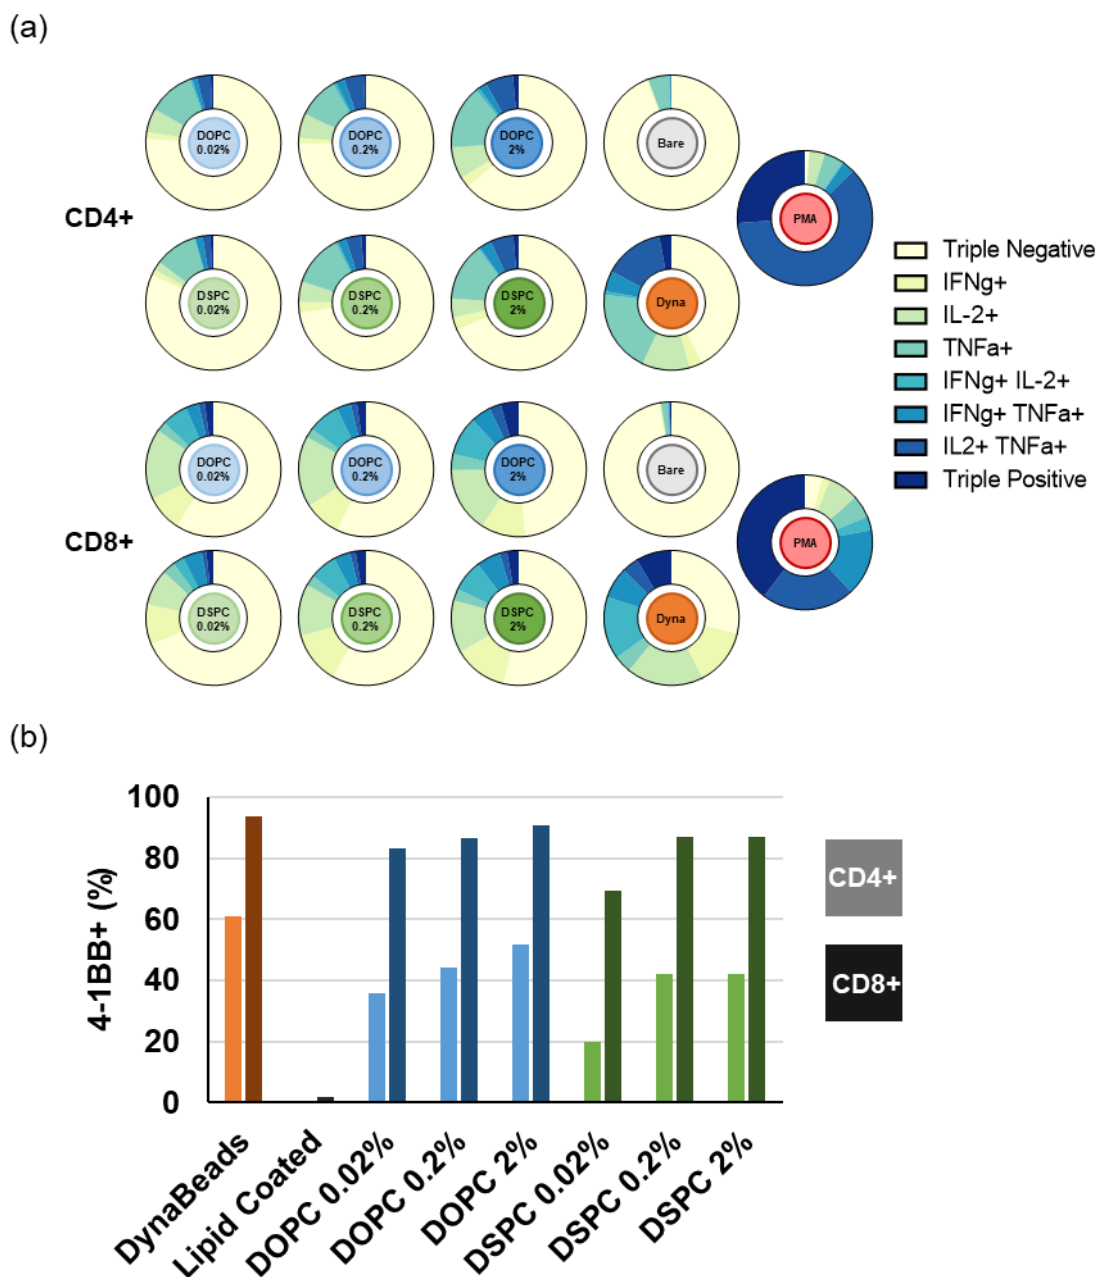

**Figure S4.** 72-hour microsphere particle activation. (a) Basal cytokine production and (b) 4-1BB expression in CD4<sup>+</sup> and CD8<sup>+</sup> T cells co-cultured with microsphere activation particles (n = 1).

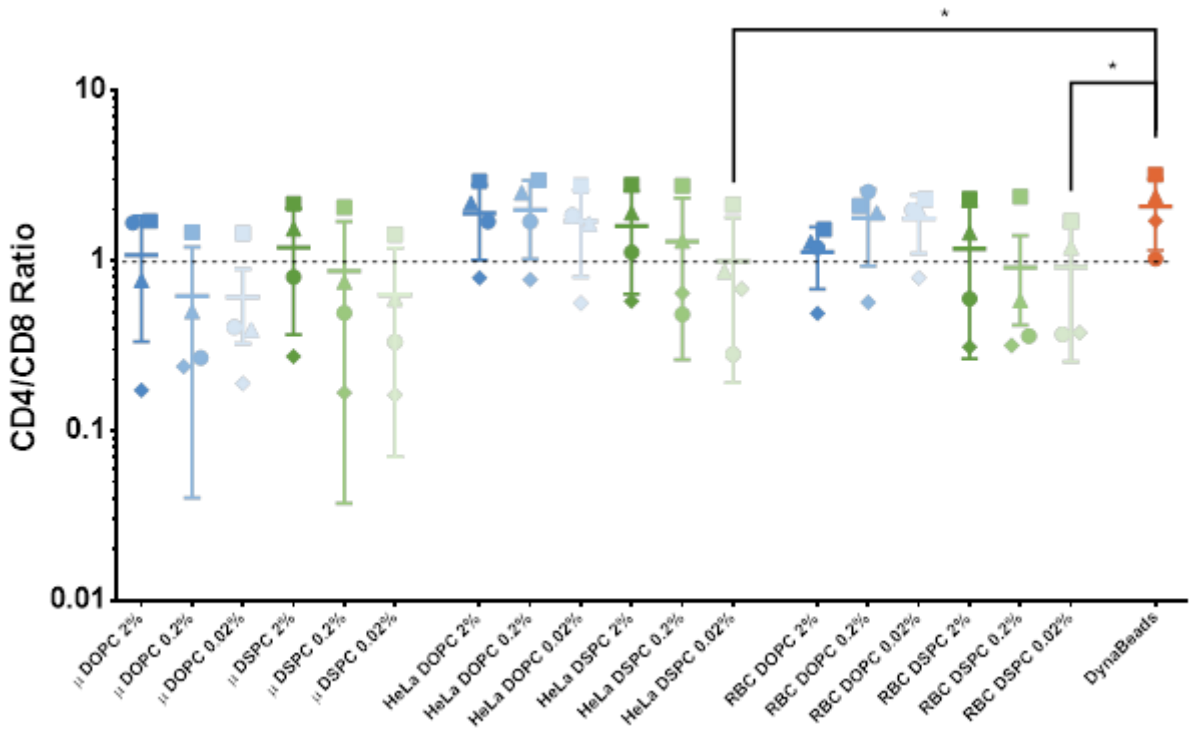

**Figure S5.** Ratio of CD4<sup>+</sup> to CD8<sup>+</sup> T cells after 9-day outgrowth. Data represented as mean  $\pm$  SD (n = 4 biological replicates; paired one-way ANOVA with Dunnett’s multiple comparisons test, \*P < 0.05).

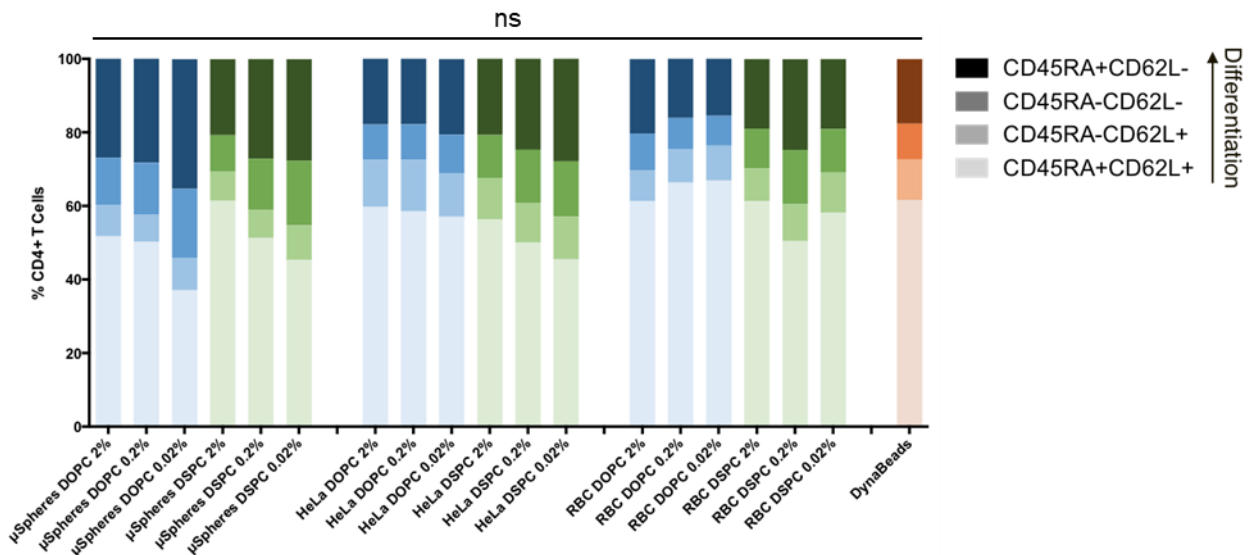

**Figure S6.** CD4<sup>+</sup> T cell differentiation at day 12 post-stimulation. Data are shown as mean of 3 independent experiments with cells from 3 donors (error bars omitted for legibility, paired two-way ANOVA with Bonferroni’s multiple comparisons test, ns = not significant).

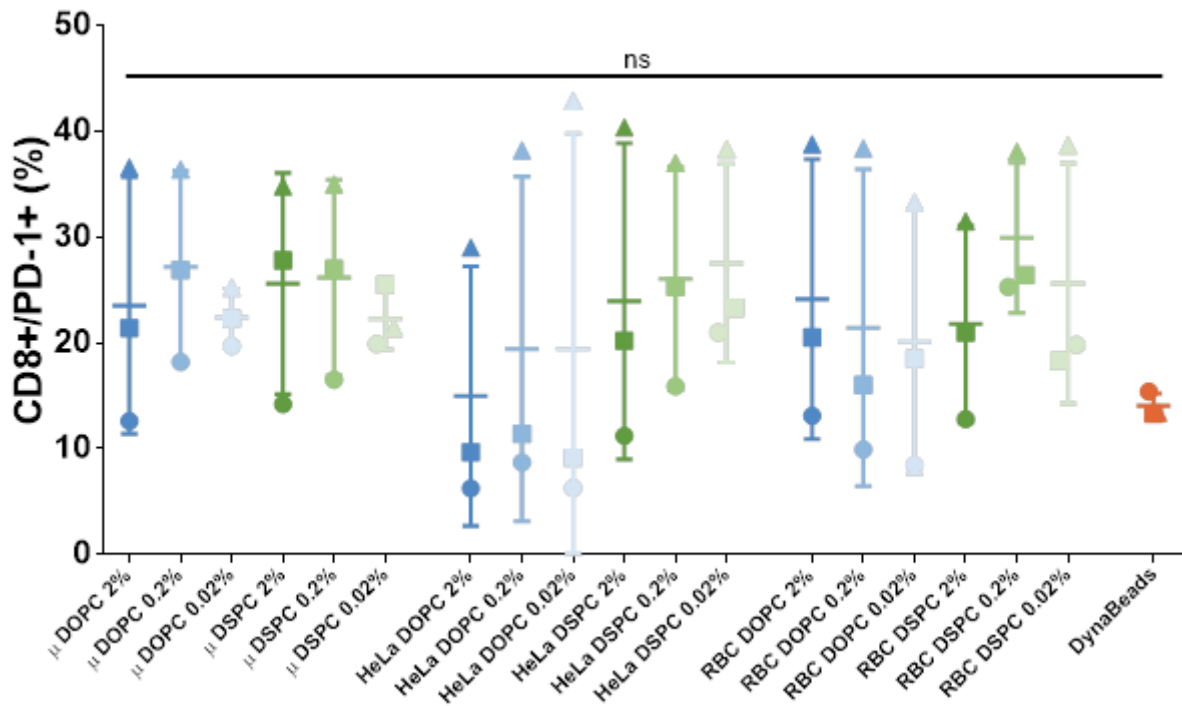

**Figure S7.** CD8<sup>+</sup> T cell PD-1 expression at day 12 post-stimulation. Data are shown as mean of 3 independent experiments with cells from 3 donors (Paired one-way ANOVA with Tukey's multiple comparisons test, ns = not significant, P = 0.33).

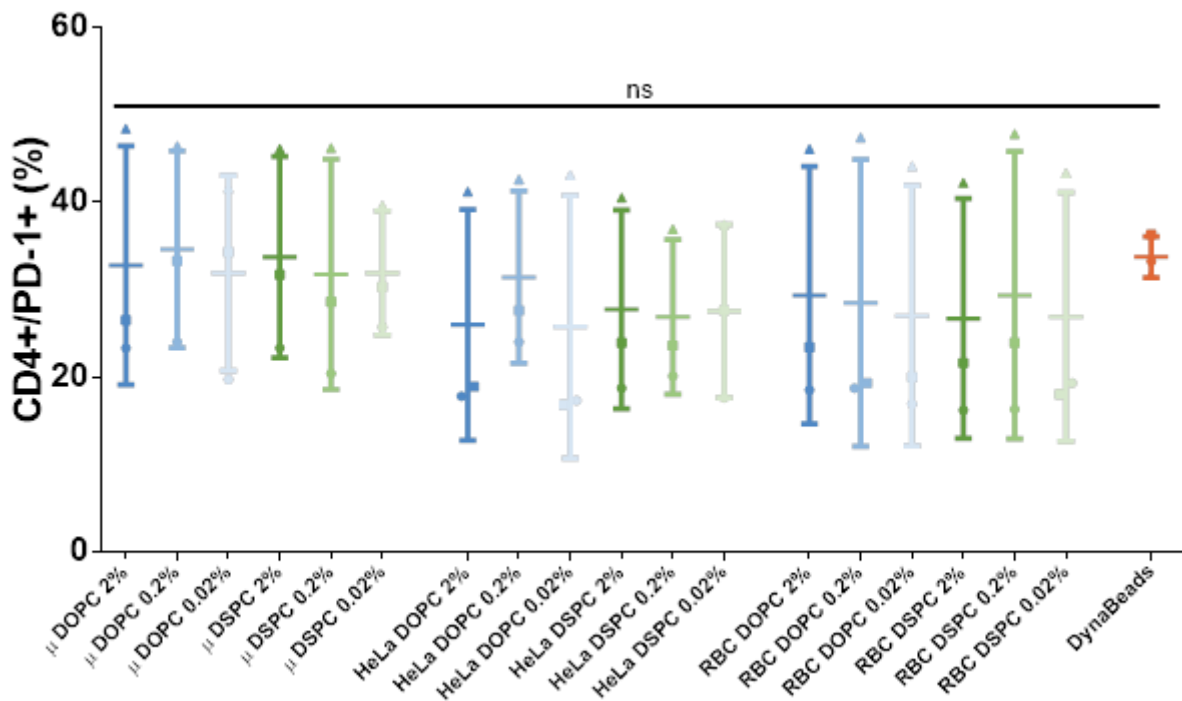

**Figure S8.** CD4<sup>+</sup> T cell PD-1 expression at day 12 post-stimulation. Data are shown as mean of 3 independent experiments with cells from 3 donors (Paired one-way ANOVA with Tukey's multiple comparisons test, ns = not significant, P = 0.40).

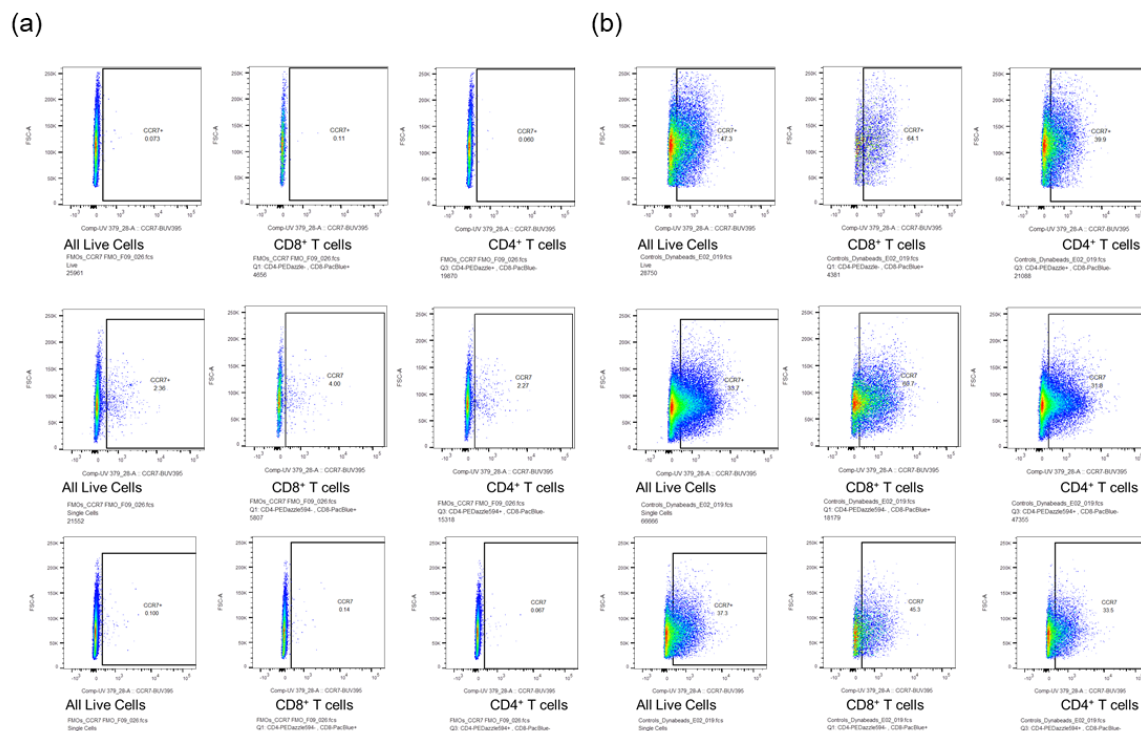

**Figure S9.** (a) Fluorescence-minus-one (FMO) gating and (b) DynaBeads control gating of CCR7<sup>+</sup> cells in live cell, CD4<sup>+</sup>, and CD8<sup>+</sup> T cell populations of three independent donors.



(a)

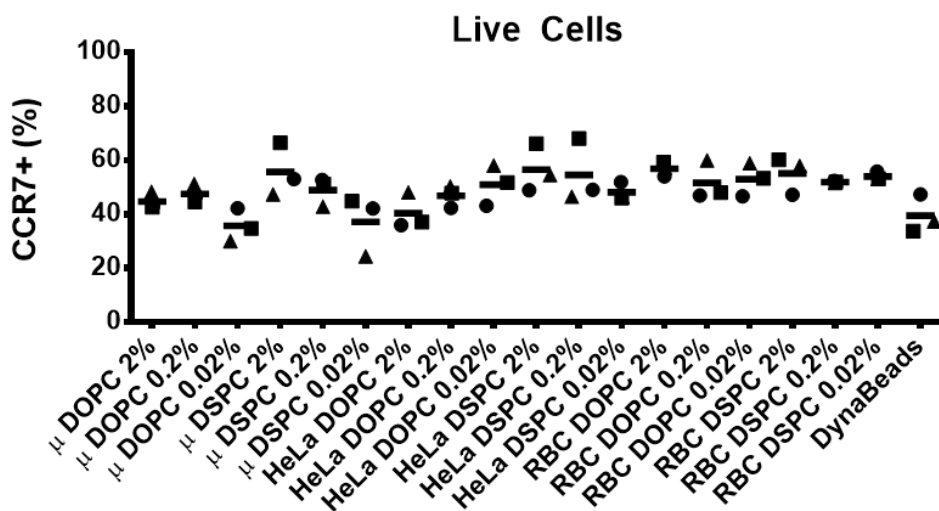

(b)

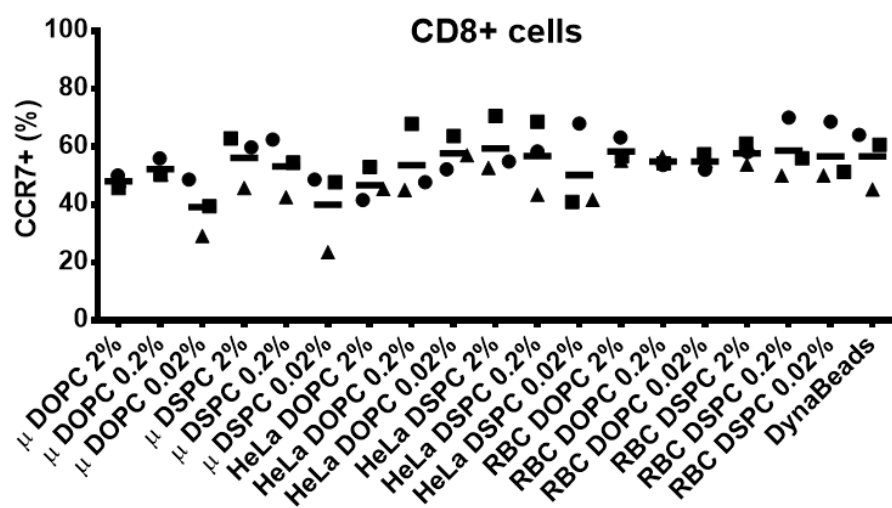

(c)

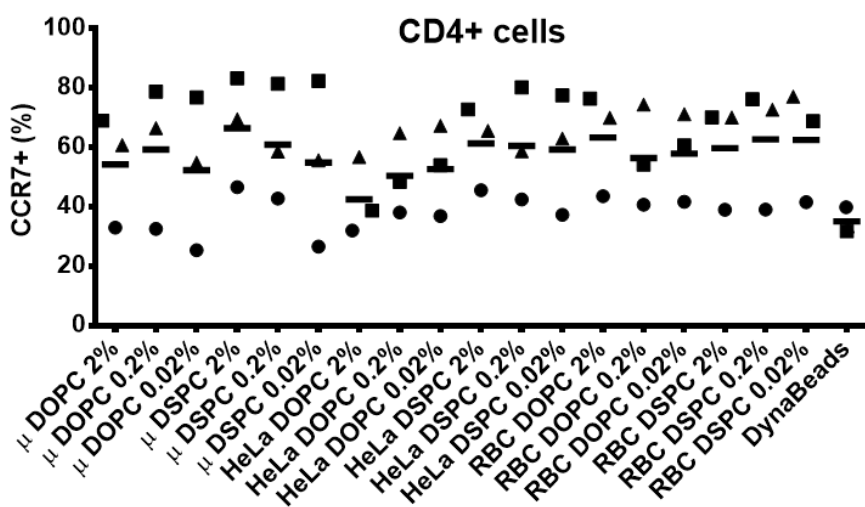

**Figure S10.** Percent of population that is CCR7<sup>+</sup> of (a) live cells, (b) CD8<sup>+</sup> T cells, and (c) CD4<sup>+</sup> T cells. Data represented as mean and individual data points of three independent donors with each symbol representing a different donor.
